# Supplementary material for: Characterization and charge transfer properties of organic BODIPY dyes integrated in TiO2nanotube based dye-sensitized solar cells
Source: Royal Society of Chemistry journal article supplement (doi:10.1039/c6ra14152h), 2016-01-01
Supplement: c6ra14152h1.pdf [file c6ra14152h1.pdf]

## Supplementary Information:

### Characterization and charge transfer properties of organic BODIPY dyes integrated in TiO<sub>2</sub> nanotubes based Dye-sensitized Solar Cells

I. Gonzalez-Valls,\* A. Mirloup, T. Le Bahers, N. Keller, T. Cottineau,\* P. Sautet, and V. Keller

#### Optimization of the TiO<sub>2</sub> NTs synthesis by electrochemical anodization:

Several anodization parameters were studied for the formation of the TiO<sub>2</sub> NTs on the FTO slides, in Table S1 are reported all these conditions. The increase of the NH<sub>4</sub>F weight content from 0.3% to 0.5% promoted the anodization process (Figure S1a), the anodization time to consume the Ti layer and convert it in a transparent TiO<sub>2</sub> NTs layer was reduced by half. On the other hand, the increase of water volume content from 1 % to 3 %, slowed down the process but it also allowed the formation of a more homogeneous NT layer with a less drastic anodization method. As we can observe in Figure S1b, the current density final rise was earlier for 3% vol. H<sub>2</sub>O. The most homogeneous anodization was obtained by using 0.5 % wt NH<sub>4</sub>F with 3 % vol. H<sub>2</sub>O in ethylene glycol (EG) electrolyte, applying a potential of 45 V and 18 °C temperature. However, in these conditions a thin layer of titanium was observed on top of the TiO<sub>2</sub> NTs after the anodization (Figure S2a). For this reason the temperature was increased from 18 °C to 30 °C to eliminate this titanium upper layer, but then the TiO<sub>2</sub> NTs appeared broken on the SEM images (Figure S2b). Thus, applying an intermediate temperature of 25 °C was found to be the optimum temperature to achieve the uniform layer of open-ended TiO<sub>2</sub> NTs. Figure S1c shows the temperature effect on the anodization speed process for 3 electrodes with the same thickness of sputtered Ti layer. Additionally, two different anodization potentials were applied to form the TiO<sub>2</sub> NTs, 45 V and 35 V. The potential is a very important parameter in the anodization technique; the applied voltage modifies the electric field between the electrolyte and the oxide layer, thus modifying the NTs diameter due to a faster or slower migration of the F<sup>-</sup> ions from the electrolyte into the TiO<sub>2</sub> layer. Increasing the voltage enhances both the growth rate formation of TiO<sub>2</sub> NTs and also the dissolution speed of the NTs with the complexation of F<sup>-</sup> producing [TiF<sub>6</sub>]<sup>2-</sup> and as a result, it expands the NT diameters [1–4]. The 45 V potential was observed to give better results than the 35 V, the anodization was faster and more uniform.

**Table S1.** Electrochemical anodization conditions studied to optimize the preparation of TiO<sub>2</sub> NTs on FTO slides.

| $\%_{w/w}$ NH <sub>4</sub> F | $\%_{v/v}$ H <sub>2</sub> O | Temperature  | Voltage     |
|------------------------------|-----------------------------|--------------|-------------|
| 0.3%                         | 1%                          | 18 °C        | 45 V        |
| 0.5%                         | 2%                          |              |             |
|                              | 3%                          |              |             |
| 0.3%                         | 1%                          | 30 °C        |             |
| 0.5%                         | 3%                          |              |             |
| <b>0.5%</b>                  | <b>3%</b>                   | <b>24 °C</b> | <b>45 V</b> |
|                              |                             |              | 35 V        |

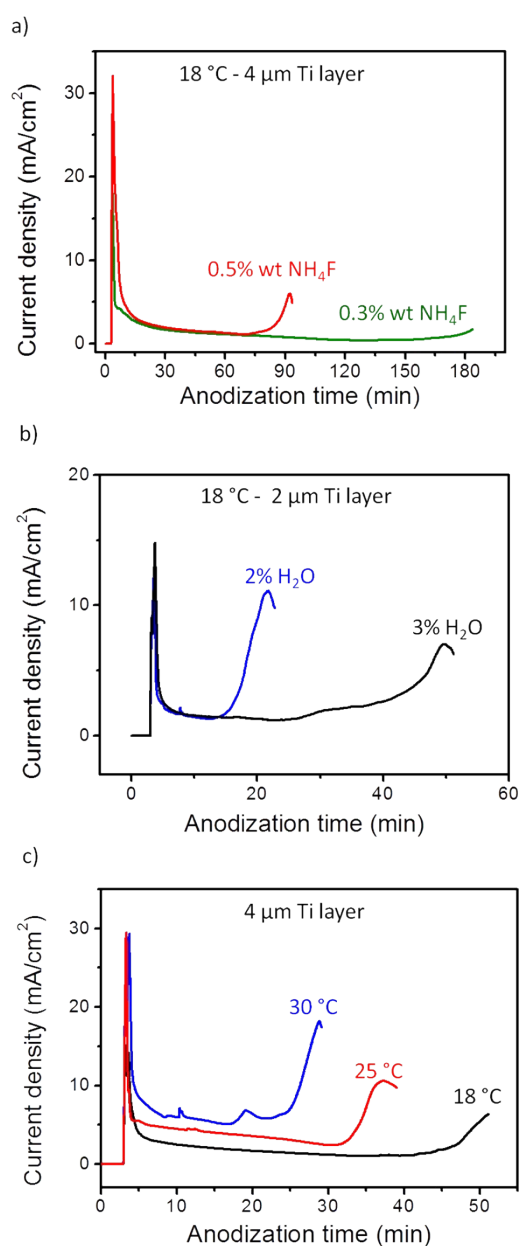

**Figure S1.** Effect of different conditions in the anodization process of the TiO<sub>2</sub> NTs preparation: a) NH<sub>4</sub>F content (2%<sub>v/v</sub> H<sub>2</sub>O in EG, 18 °C, 45 V), b) H<sub>2</sub>O content (0.5%<sub>w/w</sub> NH<sub>4</sub>F in EG at 18°C, 45 V) and c) temperature (3%<sub>v/v</sub> H<sub>2</sub>O, 0.5%<sub>w/w</sub> NH<sub>4</sub>F in EG, 45 V).

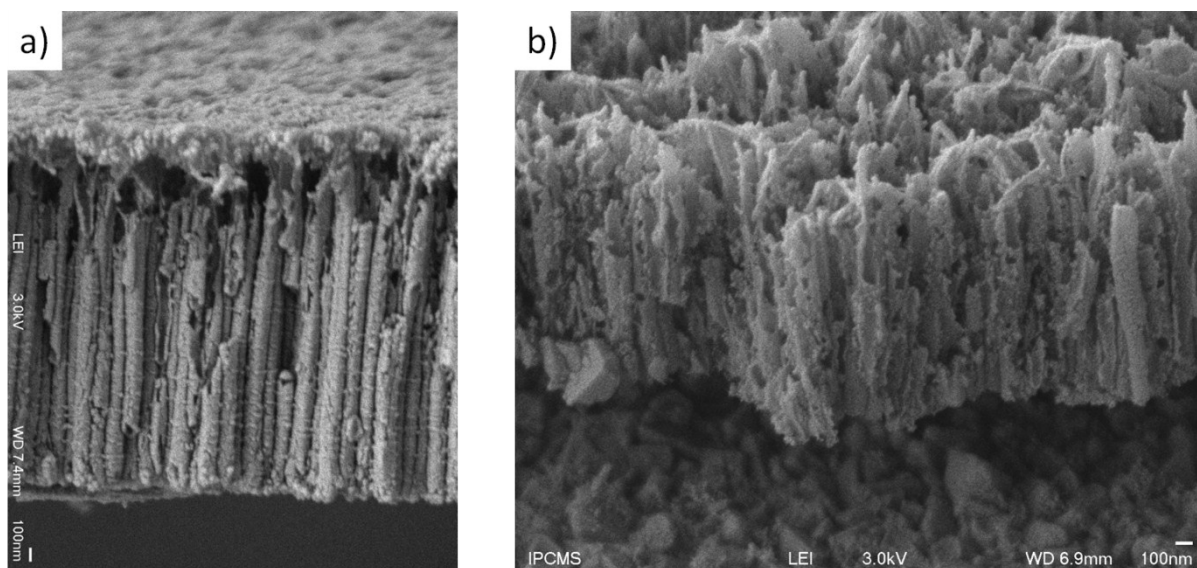

**Figure S2.** Cross-section SEM images tilted at 45° of electrode A prepared at different electrochemical anodization temperatures: a) 18 °C and b) 30 °C. The other anodization parameters were maintained the same: 0.5 % wt  $\text{NH}_4\text{F}$  with 3 % vol.  $\text{H}_2\text{O}$  in EG at 45 V.

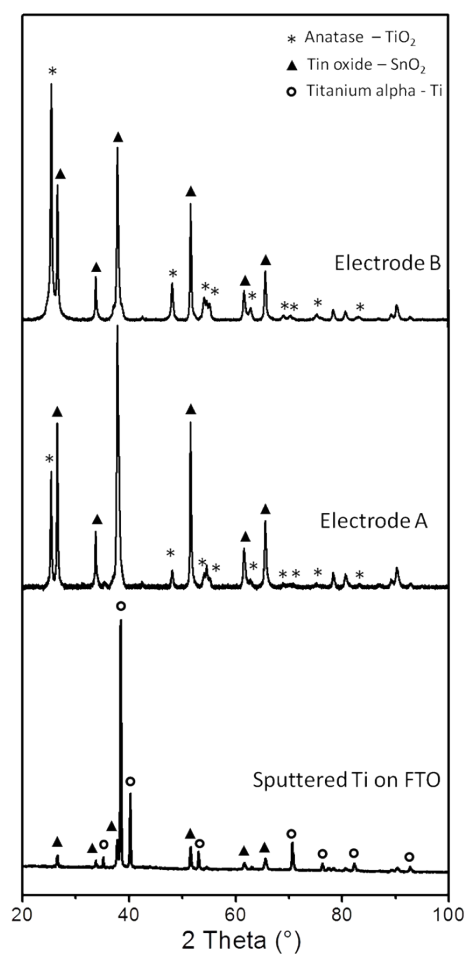

**Figure S3.** XRD analyses of  $\text{TiO}_2$  NTs of electrode A and B and sputtered Ti on FTO.

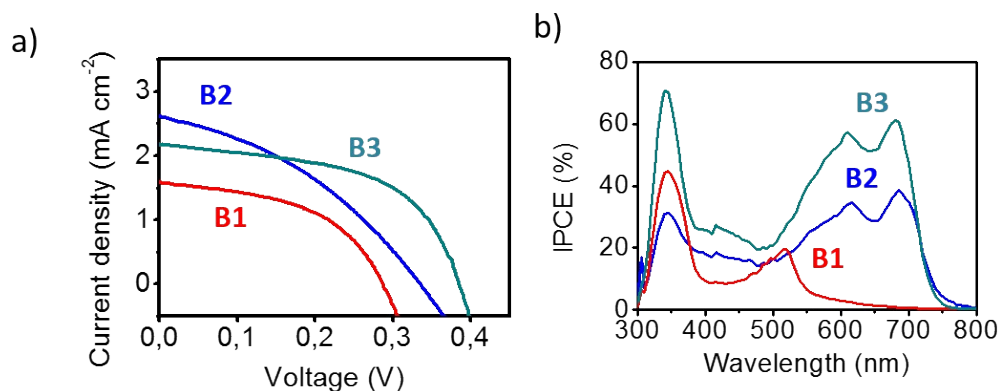

**Figure S4.** a) Current-voltage graphs of DSCs with electrode of 8.8  $\mu\text{m}$   $\text{TiO}_2$  NTs length on titanium foil grafted with B1, B2 and B3 dyes and b) IPCE graphs of the same cells.

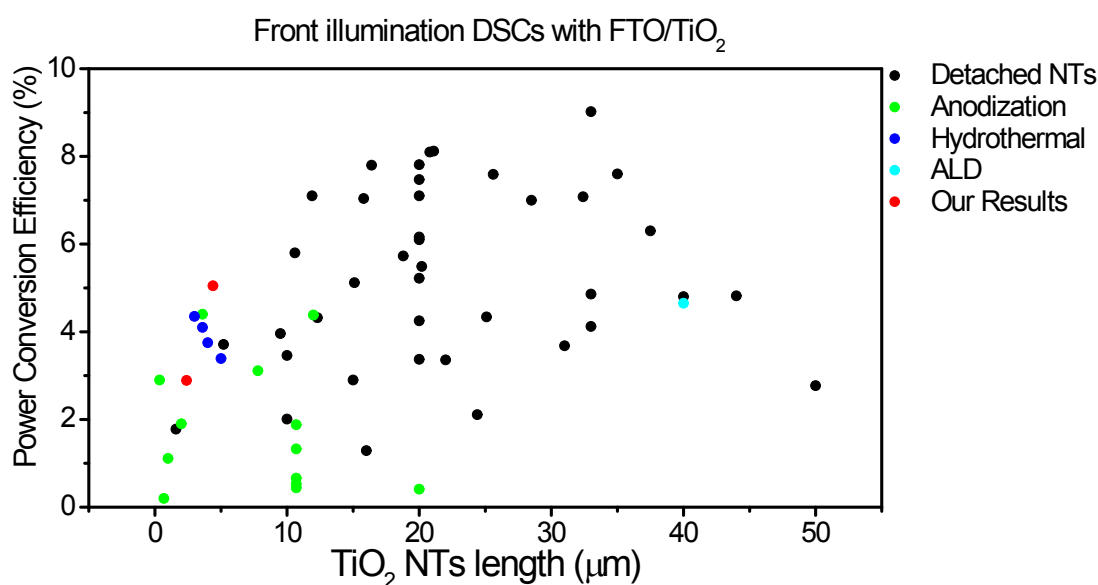

**Figure S5.** Power conversion efficiency vs.  $\text{TiO}_2$  NTs length of reported DSCs with Ruthenium dyes (N719 or N3 dyes) from references [3,5–30], the results reported in this manuscript are in red.

**Table S2.** Photovoltaic and IPCE parameters for the DSCs obtained with electrode of 8.8  $\mu\text{m}$   $\text{TiO}_2$  NTs length grown from titanium foil and grafted with B1, B2 and B3 dyes. Quantity of dye adsorbed measured by dye desorption.

| Dye | $V_{oc}$<br>(V) | $J_{sc}$<br>( $\text{mA}\cdot\text{cm}^{-2}$ ) | FF<br>(%) | PCE<br>(%) | Dye adsorbed on<br>the $\text{TiO}_2$ NTs<br>( $10^{-8}\text{ mol}\cdot\text{cm}^{-2}$ ) | IPCE<br>(at $\lambda_{max}$ )<br>(%) |
|-----|-----------------|------------------------------------------------|-----------|------------|------------------------------------------------------------------------------------------|--------------------------------------|
| B1  | 0.29            | 1.57                                           | 49        | 0.22       | 3.6                                                                                      | 20 % (515 nm)                        |
| B2  | 0.34            | 2.61                                           | 37        | 0.33       | 0.6                                                                                      | 38 % (685 nm)                        |

|    |      |      |    |      |     |               |
|----|------|------|----|------|-----|---------------|
| B3 | 0.39 | 2.19 | 55 | 0.47 | 1.0 | 61 % (680 nm) |
|----|------|------|----|------|-----|---------------|

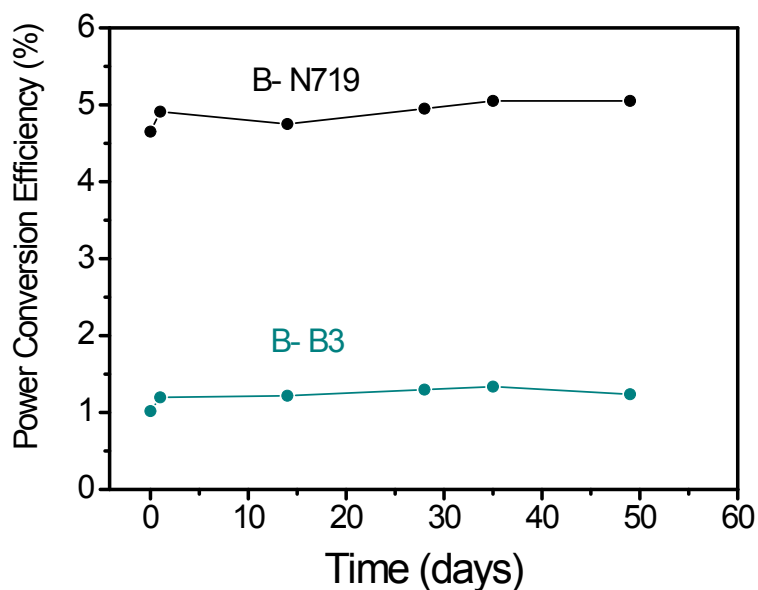

**Figure S6.** Power Conversion Efficiency with time of DSCs with 4.4  $\mu\text{m}$   $\text{TiO}_2$  NTs length (electrode B) and N719 dye or B3 dye.

**Table S3.** Fitted results of EIS on DSCs with electrode A and B applying the dye N719 and B3. Electron lifetime ( $\tau$ ) measured from the frequency peak of Bode representation.

| Electrode                      |     |      | Voltage<br>(V) | $R_1$<br>( $\Omega$ ) | $C_2$<br>(F)        | $a_2$ | $R_2$<br>( $\Omega$ ) | $C_3$<br>(F)        | $a_3$ | $R_3$<br>( $\Omega$ ) | $\tau$<br>(ms) |
|--------------------------------|-----|------|----------------|-----------------------|---------------------|-------|-----------------------|---------------------|-------|-----------------------|----------------|
| NT length<br>( $\mu\text{m}$ ) | Dye |      |                |                       |                     |       |                       |                     |       |                       |                |
| A                              | 2.4 | N719 | 0.6 - dark     | 108                   | $5.4 \cdot 10^{-7}$ | 0.80  | 15                    | $1.4 \cdot 10^{-4}$ | 0.87  | 327                   | 22             |
|                                |     |      | 0.6 - light    | 107                   | $5.3 \cdot 10^{-7}$ | 0.80  | 13                    | $1.3 \cdot 10^{-4}$ | 0.86  | 130                   | 12             |
| B                              | 4.4 | N719 | 0.6 - dark     | 95                    | $1.0 \cdot 10^{-6}$ | 0.80  | 15                    | $4.2 \cdot 10^{-4}$ | 0.83  | 144                   | 38             |
|                                |     |      | 0.6 - light    | 94                    | $1.3 \cdot 10^{-6}$ | 0.80  | 15                    | $3.4 \cdot 10^{-4}$ | 0.81  | 83                    | 23             |
| A                              | 2.4 | B3   | 0.4 - dark     | 68                    | $1.5 \cdot 10^{-6}$ | 0.80  | 11                    | $2.2 \cdot 10^{-4}$ | 0.92  | 2409                  | 96             |
|                                |     |      | 0.4 - light    | 67                    | $1.8 \cdot 10^{-6}$ | 0.80  | 8                     | $2.2 \cdot 10^{-4}$ | 0.93  | 590                   | 38             |
| B                              | 4.4 | B3   | 0.4 - dark     | 76                    | $1.1 \cdot 10^{-6}$ | 0.80  | 21                    | $2.8 \cdot 10^{-4}$ | 0.91  | 257                   | 45             |
|                                |     |      | 0.4 - light    | 75                    | $9.1 \cdot 10^{-7}$ | 0.80  | 20                    | $2.7 \cdot 10^{-4}$ | 0.90  | 131                   | 23             |

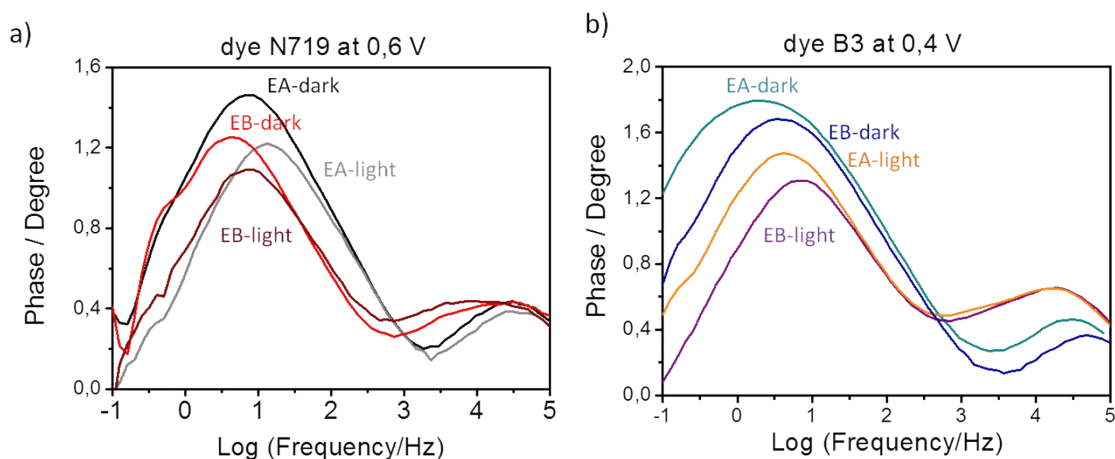

**Figure S7.** Bode plots of the EIS measurements for a) dye N719 based DSCs at 0.6 V and b) dye B3 based DSCs at 0.4 V.

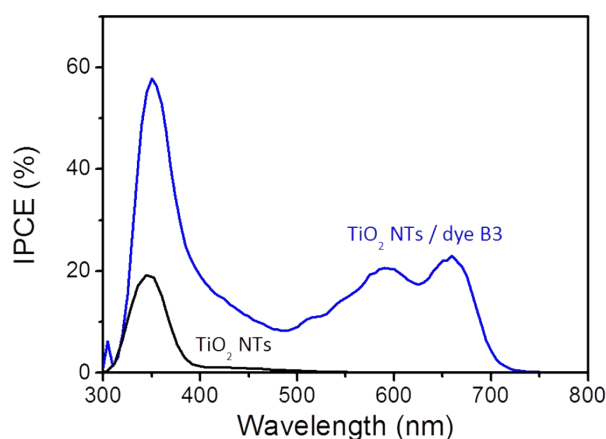

**Figure S8.** IPCE peaks of DSCs with electrode B without dye (black line) and with dye B3 (blue line).

## References

- [1] G.K. Mor, O.K. Varghese, M. Paulose, C. a. Grimes, *Adv. Funct. Mater.* 15 (2005) 1291–1296.
- [2] J. Wang, H. Wang, H. Li, J. Wu, *Thin Solid Films* 544 (2013) 276–280.
- [3] Q. Pang, L. Leng, L. Zhao, L. Zhou, C. Liang, Y. Lan, *Mater. Chem. Phys.* 125 (2011) 612–616.
- [4] S. Agarwala, G.W. Ho, *J. Solid State Chem.* 189 (2012) 101–107.
- [5] X. Feng, K. Shankar, O.K. Varghese, M. Paulose, T.J. Latempa, C.A. Grimes, T. Pennsylv, V. State, V. Uni, U. V Park, V. Pennsylv, *Nano Lett.* 8 (2008) 3781–3786.
- [6] J.H. Park, T.-W. Lee, M.G. Kang, *Chem. Commun. (Camb).* (2008) 2867–2869.

- [7] X. Gao, D. Guan, J. Huo, J. Chen, C. Yuan, *Nanoscale* 5 (2013) 10438–46.
- [8] A. Lamberti, A. Sacco, S. Bianco, D. Manfredi, M. Armandi, M. Quaglio, E. Tresso, C.F. Pirri, *Sol. Energy* 95 (2013) 90–98.
- [9] S.H. Lee, S.Y. Chae, Y.J. Hwang, K.-K. Koo, O.-S. Joo, *Appl. Phys. a-Materials Sci. Process.* 112 (2013) 733–737.
- [10] J. Lin, M. Guo, C.T. Yip, W. Lu, G. Zhang, X. Liu, L. Zhou, X. Chen, H. Huang, *Adv. Funct. Mater.* 23 (2013) 5952–5960.
- [11] G.K. Mor, K. Shankar, M. Paulose, O.K. Varghese, C.A. Grimes, *Nano Lett.* 6 (2006) 215–218.
- [12] Z. Yang, Z. Ma, D. Pan, D. Chen, F. Xu, S. Chen, *Ceram. Int.* 40 (2014) 173–180.
- [13] J. Zhang, S. Li, H. Ding, Q. Li, B. Wang, X. Wang, H. Wang, *J. Power Sources* 247 (2014) 807–812.
- [14] B. Lei, J. Liao, R. Zhang, J. Wang, C. Su, D. Kuang, (2010) 15228–15233.
- [15] G. Ji, Z. Liu, D. Guan, Y. Yang, *Appl. Surf. Sci.* 282 (2013) 695–699.
- [16] M. Paulose, K. Shankar, O.K. Varghese, G.K. Mor, C. a Grimes, *J. Phys. D. Appl. Phys.* 39 (2006) 2498–2503.
- [17] Y. Liu, Y. Cheng, K. Chen, G. Yang, Z. Peng, Q. Bao, R. Wang, W. Chen, *Electrochim. Acta* 146 (2014) 838–844.
- [18] W.-Y. Rho, H.-S. Kim, S.H. Lee, S. Jung, J.S. Suh, Y.-B. Hahn, B.-H. Jun, *Chem. Phys. Lett.* 614 (2014) 78–81.
- [19] J. Choi, Y.S. Kwon, T. Park, *J. Mater. Chem. A* 2 (2014) 14380–14385.
- [20] X. Liu, J. Lin, Y.H. Tsang, X. Chen, P. Hing, H. Huang, *J. Alloys Compd.* 607 (2014) 50–53.
- [21] S. Sadhu, P. Poddar, *J. Phys. Chem. C* 118 (2014) 19363–19373.
- [22] C.-H. Chen, K.-C. Chen, J.-L. He, *Curr. Appl. Phys.* 10 (2010) S176–S179.
- [23] K.Y. Chun, B.W. Park, Y.M. Sung, D.J. Kwak, Y.T. Hyun, M.W. Park, *Thin Solid Films* 517 (2009) 4196–4198.
- [24] X. Feng, K. Shankar, M. Paulose, C. a Grimes, *Angew. Chem. Int. Ed. Engl.* 48 (2009) 8095–8.
- [25] Y. Ji, M. Zhang, J. Cui, K.-C. Lin, H. Zheng, J.-J. Zhu, A.C.S. Samia, *Nano Energy* 1 (2012) 796–804.
- [26] S. Kathirvel, C. Su, C.-Y. Yang, Y.-J. Shiao, B.-R. Chen, W.-R. Li, *Vacuum* (2015) 1–9.
- [27] H. Park, W.-R. Kim, H.-T. Jeong, J.-J. Lee, H.-G. Kim, W.-Y. Choi, *Sol. Energy Mater. Sol. Cells* 95 (2011) 184–189.
- [28] H. Wang, H. Li, J. Wang, J. Wu, *Mater. Lett.* 80 (2012) 99–102.
- [29] D.-J. Yang, H. Park, S.-J. Cho, H.-G. Kim, W.-Y. Choi, *J. Phys. Chem. Solids* 69 (2008) 1272–1275.
- [30] W. Yuanhao, L. Lin, Y. Hongxing, *Energy Procedia* 61 (2014) 2608–2612.
